# Supplementary material for: Climate influences bill shape diversification in cavity-excavating birds
Source: bioRxiv or medRxiv preprint supplement (doi:10.1101/2022.09.20.508664), 2022-09-22

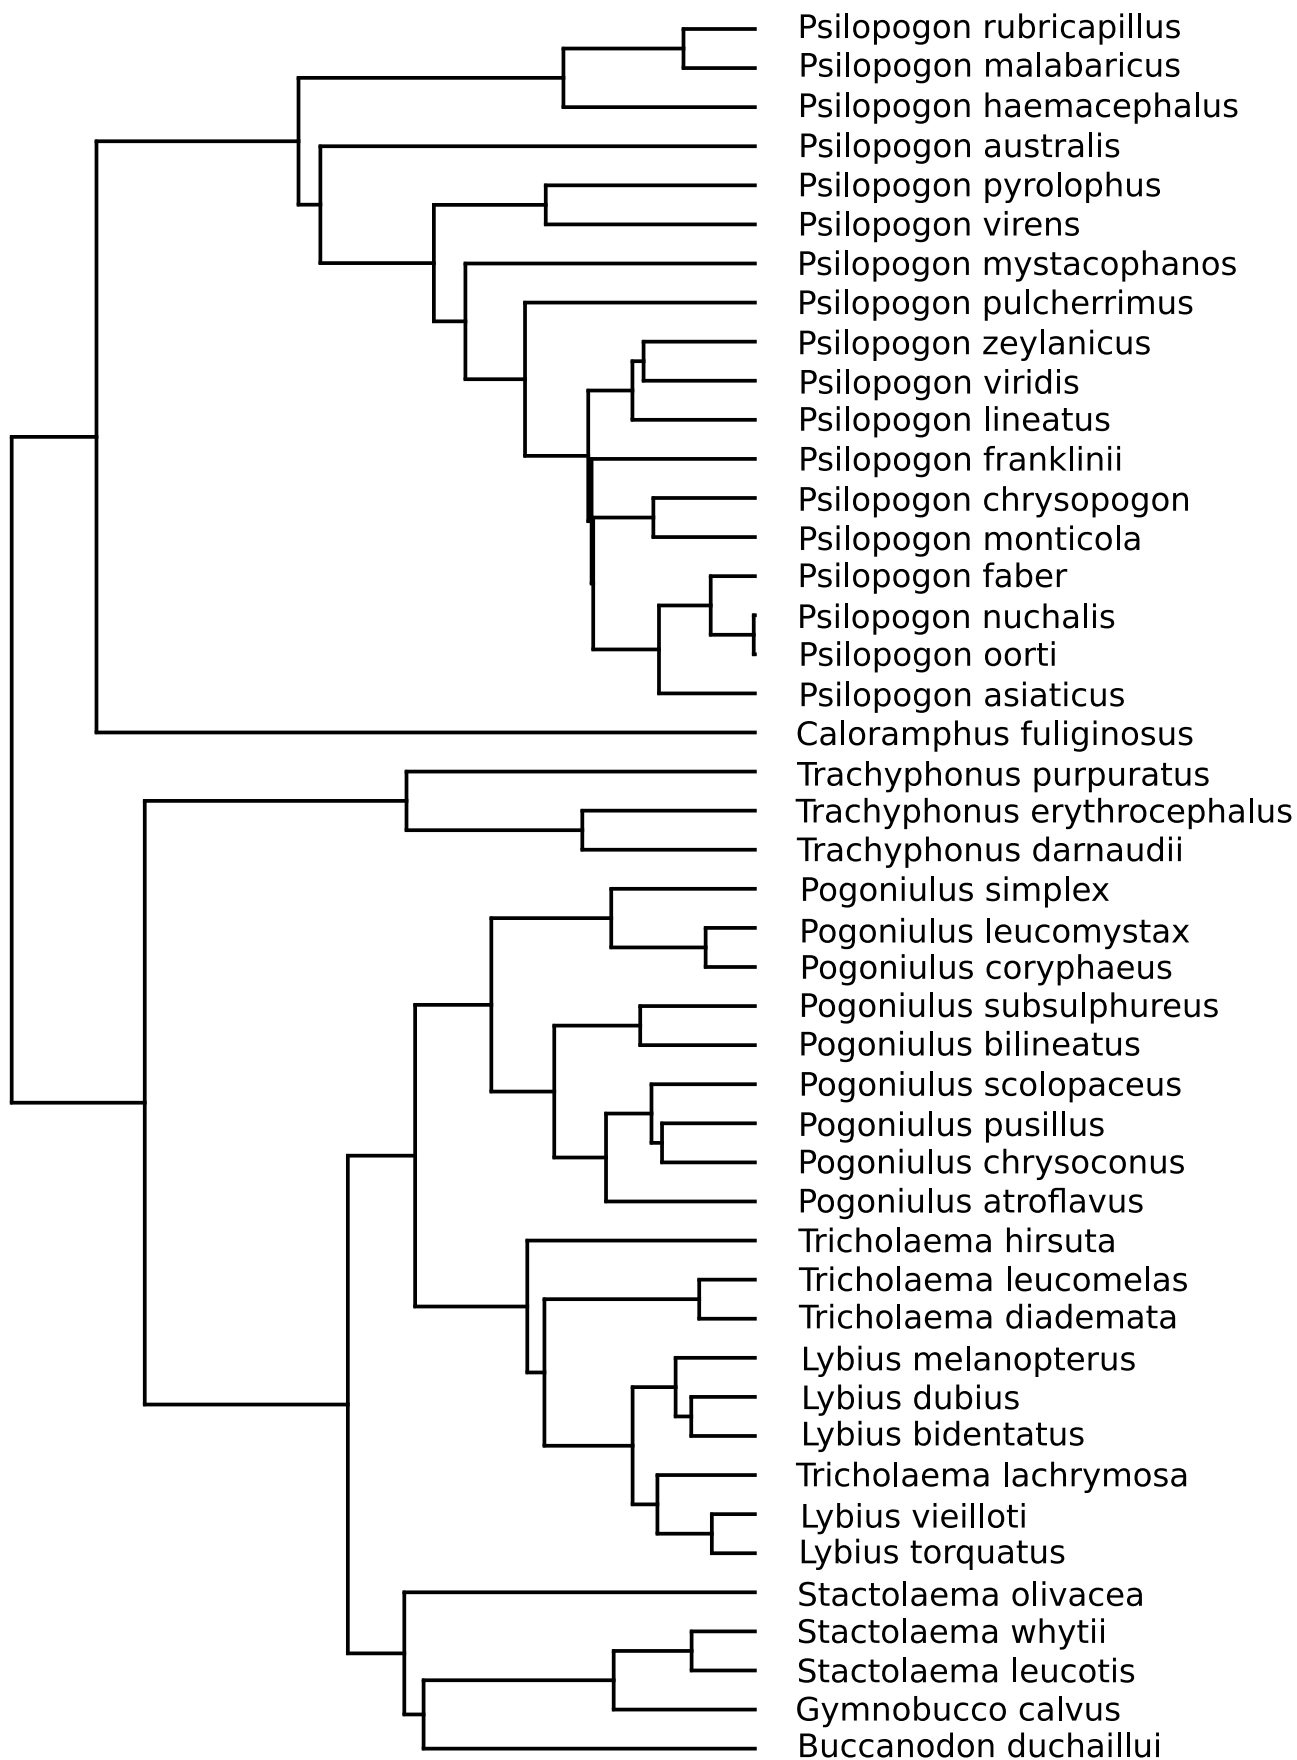

Supplement: Supplementary file [file media-2.pdf]
